# Supplementary material for: Degradable bispiperidone derivative amine networks with monomer recovery
Source: Royal Society of Chemistry journal article supplement (doi:10.1039/d4py00025k), 2024-01-01
Supplement: d4py00025k1.pdf [file d4py00025k1.pdf]

## Supporting Information

### Reversible piperidone derivative amine networks with monomer recovery

Patricia Godermajer,<sup>a</sup> Andreas J. Achazi,<sup>b,c</sup> Doreen Mollenhauer,<sup>b,c</sup> Andreas Seifert,<sup>a</sup>  
and Michael Sommer<sup>a\*</sup>

<sup>a</sup>Technische Universität Chemnitz, Institut für Chemie, Professur Polymerchemie,  
Straße der Nationen 62, 09111 Chemnitz (Germany).

<sup>b</sup>Justus-Liebig-Universität Gießen, Physikalisch-Chemisches Institut,  
Heinrich-Buff-Ring 17, 35392 Gießen (Germany).

<sup>c</sup>Justus-Liebig-Universität Gießen, Zentrum für Materialforschung,  
Heinrich-Buff-Ring 16, 35392 Gießen (Germany).

[\\*michael.sommer@chemie.tu-chemnitz.de](mailto:michael.sommer@chemie.tu-chemnitz.de)

## Table of Contents

|                                                   |    |
|---------------------------------------------------|----|
| 1. Theoretical calculation of thermodynamics      | 1  |
| 2. NMR spectra of monomers                        | 4  |
| 3. Determination of diol contents                 | 8  |
| 4. NMR spectra of model compounds NAP-I and NAP-E | 14 |
| 5. FT ATIR spectra of polymers                    | 15 |
| 6. TGA data of polymers                           | 16 |
| 7. Hydrolysis of Bispiperidone-TREN polymers      | 17 |

# 1. Theoretical calculation of thermodynamics

## Results

Table S1: The Gibbs energy of formation  $\Delta G_{\text{reac}}(c,T)$  at various concentrations  $c$  and temperatures  $T$  given in  $\text{kJ mol}^{-1}$ . The reactions are shown in Scheme 2. Two different DFT based methods were used: PBE0-D4/def2-QZVP//def2-TZVP (DCOSMO-RS-out) and M06-2X/def2-QZVP//def2-TZVP (SMD).

|                                             |                                   | $\Delta G_{\text{reac}}(c,T)$ in $\text{kJ mol}^{-1}$ |       |       |        |       |       |                                      |       |       |
|---------------------------------------------|-----------------------------------|-------------------------------------------------------|-------|-------|--------|-------|-------|--------------------------------------|-------|-------|
| Computational method                        |                                   | PBE0-D3(BJ)/def2-QZVP//def2-TZVP<br>(DCOSMO-RS-out)   |       |       |        |       |       | M06-2X/def2-QZVP//def2-TZVP<br>(SMD) |       |       |
| Temperature $T$ in K                        |                                   | 298.15                                                |       |       | 333.15 |       |       | 333.15                               |       |       |
| concentration $c$<br>in $\text{mol L}^{-1}$ |                                   | 0.35                                                  | 1     | 10    | 0.35   | 1     | 10    | 0.35                                 | 1     | 10    |
| Product                                     | R                                 |                                                       |       |       |        |       |       |                                      |       |       |
| Hemiaminal                                  | -CH <sub>2</sub> -CH <sub>3</sub> | 25.4                                                  | 22.8  | 17.1  | 31.0   | 28.1  | 21.7  | 24.4                                 | 21.5  | 15.1  |
|                                             | -CO-CH <sub>3</sub>               | 15.0                                                  | 12.4  | 6.7   | 20.5   | 17.6  | 11.2  | 14.3                                 | 11.4  | 5.0   |
|                                             | -CO-COH                           | 14.9                                                  | 12.3  | 6.6   | 20.4   | 17.5  | 11.1  | 14.0                                 | 11.1  | 4.7   |
| Aminal                                      | -CH <sub>2</sub> -CH <sub>3</sub> | 10.4                                                  | 7.8   | 2.1   | 16.7   | 13.8  | 7.5   | 16.8                                 | 13.9  | 7.5   |
|                                             | -CO-CH <sub>3</sub>               | -1.5                                                  | -4.1  | -9.8  | 4.7    | 1.8   | -4.6  | 9.5                                  | 6.6   | 0.2   |
|                                             | -CO-COH                           | -1.6                                                  | -4.2  | -9.9  | 4.6    | 1.7   | -4.6  | 4.9                                  | 1.9   | -4.4  |
| Imine                                       | -CH <sub>2</sub> -CH <sub>3</sub> | -5.7                                                  | -5.7  | -5.7  | -4.8   | -4.8  | -4.8  | 9.9                                  | 9.9   | 9.9   |
|                                             | -CO-CH <sub>3</sub>               | -14.8                                                 | -14.8 | -14.8 | -14.1  | -14.1 | -14.1 | -0.4                                 | -0.4  | -0.4  |
|                                             | -CO-COH                           | -13.9                                                 | -13.9 | -13.9 | -13.1  | -13.1 | -13.1 | -0.6                                 | -0.6  | -0.6  |
| Enamine                                     | -CH <sub>2</sub> -CH <sub>3</sub> | -5.9                                                  | -5.9  | -5.9  | -5.2   | -5.2  | -5.2  | 9.6                                  | 9.6   | 9.6   |
|                                             | -CO-CH <sub>3</sub>               | -11.2                                                 | -11.2 | -11.2 | -10.6  | -10.6 | -10.6 | 2.2                                  | 2.2   | 2.2   |
|                                             | -CO-COH                           | -10.7                                                 | -10.7 | -10.7 | -10.1  | -10.1 | -10.1 | 1.1                                  | 1.1   | 1.1   |
| Cyclo-Aminal                                | -CH <sub>2</sub> -CH <sub>3</sub> | -42.5                                                 | -42.5 | -42.5 | -39.9  | -39.9 | -39.9 | -23.2                                | -23.2 | -23.2 |
|                                             | -CO-CH <sub>3</sub>               | -47.3                                                 | -47.3 | -47.3 | -44.7  | -44.7 | -44.7 | -29.1                                | -29.1 | -29.1 |
|                                             | -CO-COH                           | -47.6                                                 | -47.6 | -47.6 | -45.1  | -45.1 | -45.1 | -31.7                                | -31.7 | -31.7 |
| Enamine-Imine                               | -CH <sub>2</sub> -CH <sub>3</sub> | -9.5                                                  | -9.5  | -9.5  | -6.7   | -6.7  | -6.7  | 16.0                                 | 16.0  | 16.0  |
|                                             | -CO-CH <sub>3</sub>               | -27.9                                                 | -27.9 | -27.9 | -25.6  | -25.6 | -25.6 | -1.8                                 | -1.8  | -1.8  |
|                                             | -CO-COH                           | -32.3                                                 | -32.3 | -32.3 | -29.4  | -29.4 | -29.4 | -3.3                                 | -3.3  | -3.3  |

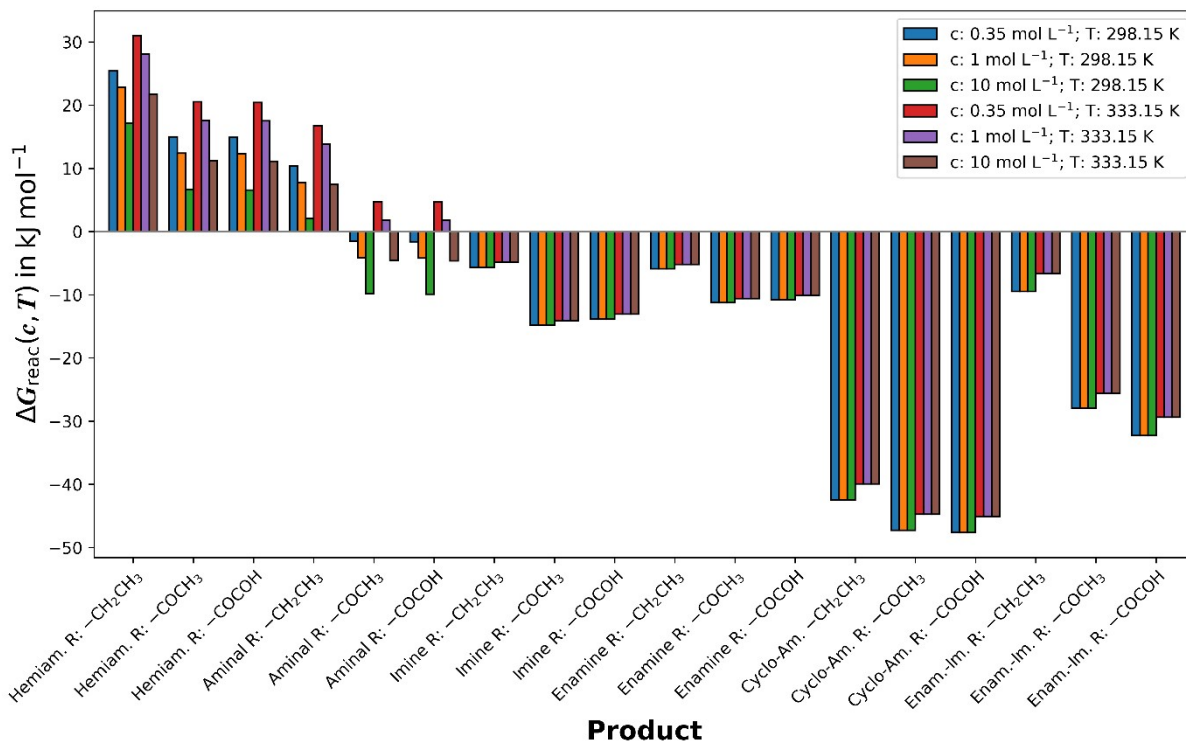

Figure S1: The Gibbs energy of formation  $\Delta G_{\text{reac}}(c, T)$  at various concentrations  $c$  and temperatures  $T$  is presented in  $\text{kJ mol}^{-1}$ . The reactions are shown in Scheme 2. The data were calculated at the PBE0-D4/def2-QZVP//def2-TZVP (DCOSMO-RS-out) level of theory. Some of the results are also shown in Figure 3 and all of the results in Table S1.

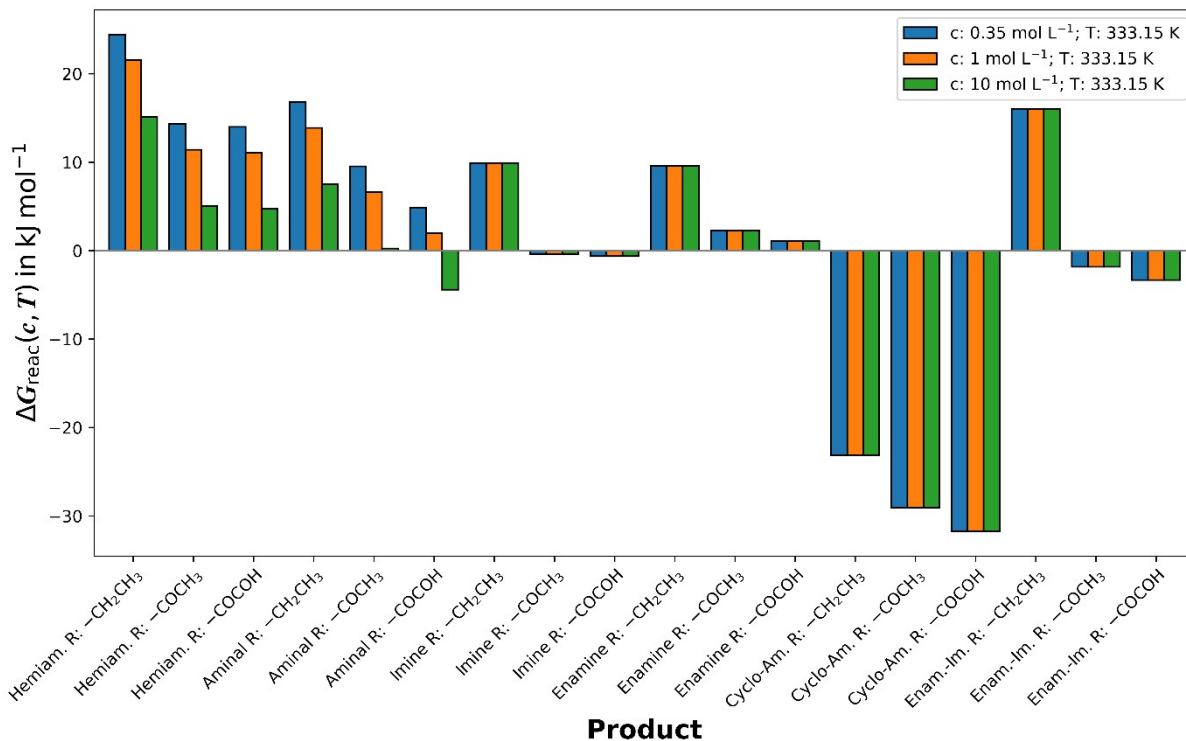

Figure S2: The Gibbs energy of formation  $\Delta G_{\text{reac}}(c, T)$  at various concentrations  $c$  and temperatures  $T$  is presented in  $\text{kJ mol}^{-1}$ . The reactions are shown in Scheme 2. The data were calculated at the M06-2X/def2-QZVP//def2-TZVP (SMD) level of theory. All of the results are also shown in Table S1.

### **Coordinates of the molecular structures**

The coordinates of all optimised structures can be downloaded from:

**\*\*<http://dx.doi.org/10.22029/jlupub-18387>\*\***

The optimised structures are given for PBE0-D3(BJ)/def2-TZVP (DCOSMO-RS) and M06-2X/def2-TZVP (SMD).

## 2. NMR spectra of monomers

OBP

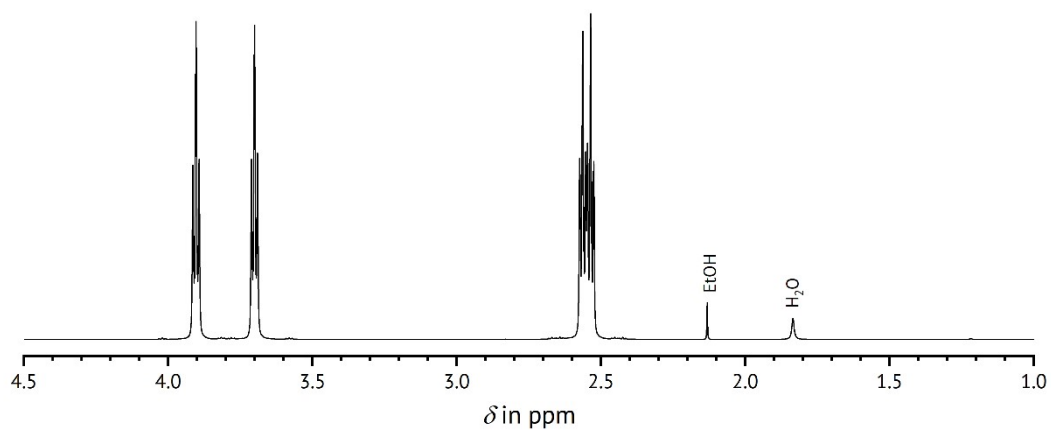

Figure S3:  $^1\text{H}$  NMR spectrum of OBP measured in  $\text{CDCl}_3$ .

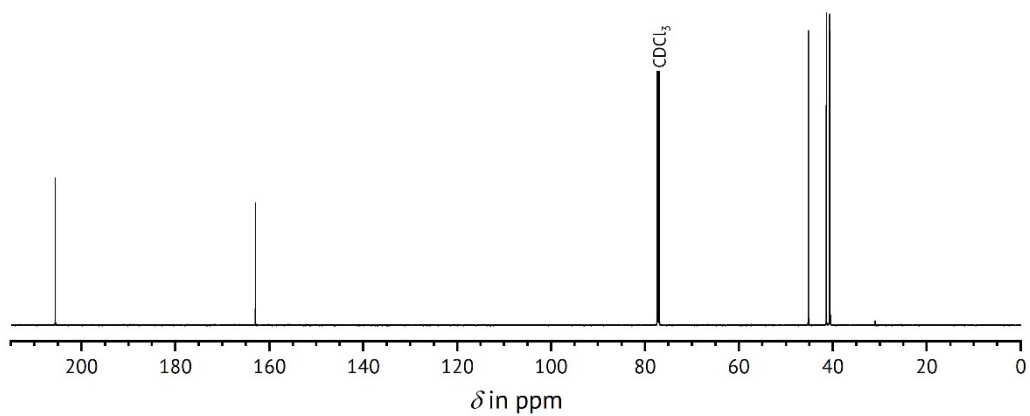

Figure S4:  $^{13}\text{C}\{-^1\text{H}\}$  NMR spectrum of OBP measured in  $\text{CDCl}_3$ .

# ABP

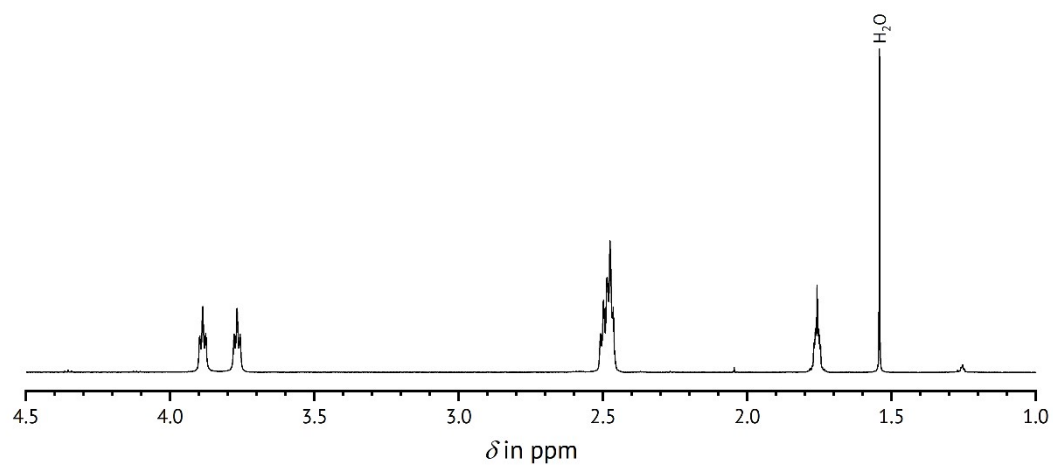

Figure S5:  $^1\text{H}$  NMR spectrum of ABP measured in  $\text{CDCl}_3$ .

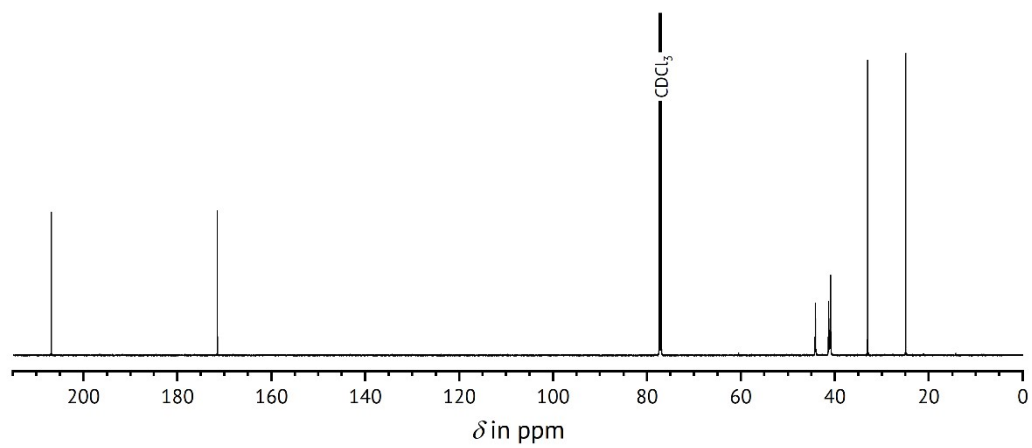

Figure S6:  $^{13}\text{C}\{-^1\text{H}\}$  NMR spectrum of ABP measured in  $\text{CDCl}_3$ .

## PBP

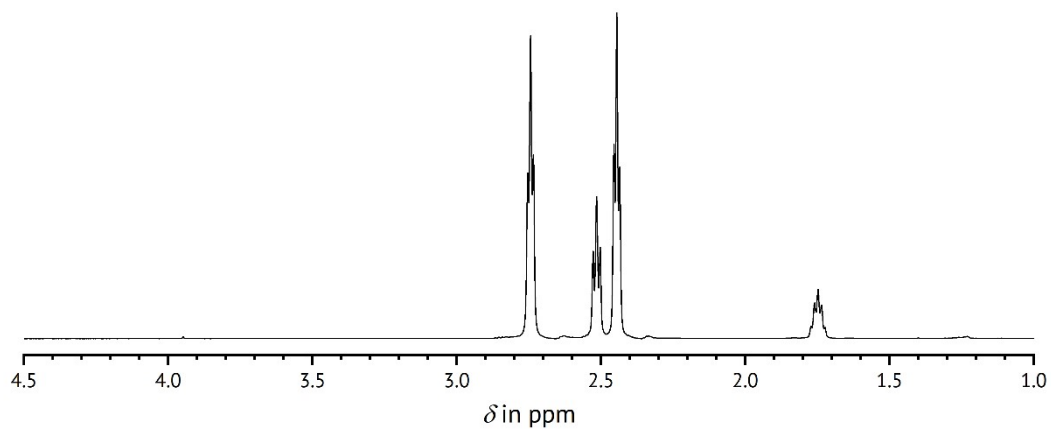

Figure S7: <sup>1</sup>H NMR spectrum of PBP measured in CDCl<sub>3</sub>.

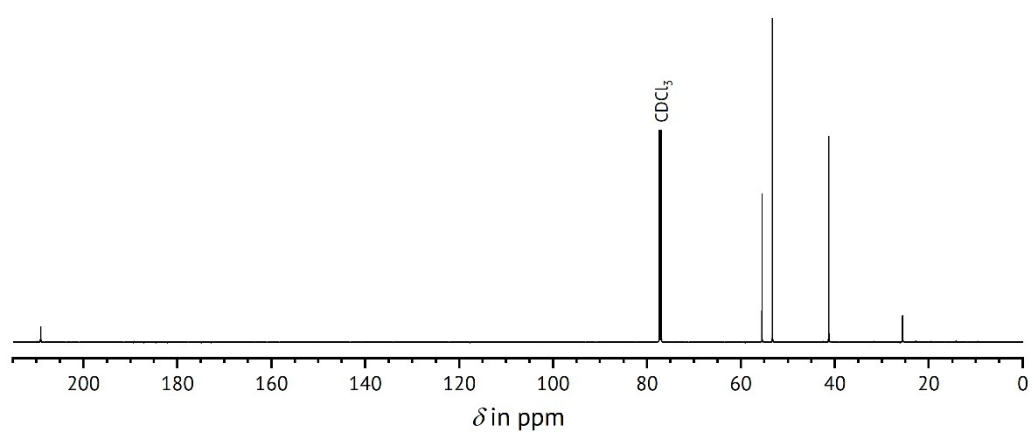

Figure S8: <sup>13</sup>C-{<sup>1</sup>H} NMR spectrum of PBP measured in CDCl<sub>3</sub>.



**1,3-Bis(1,4-dioxa-8-azaspiro[4.5]decan-8-yl)propane hydrobromide (EO<sub>2</sub>-PBP)**

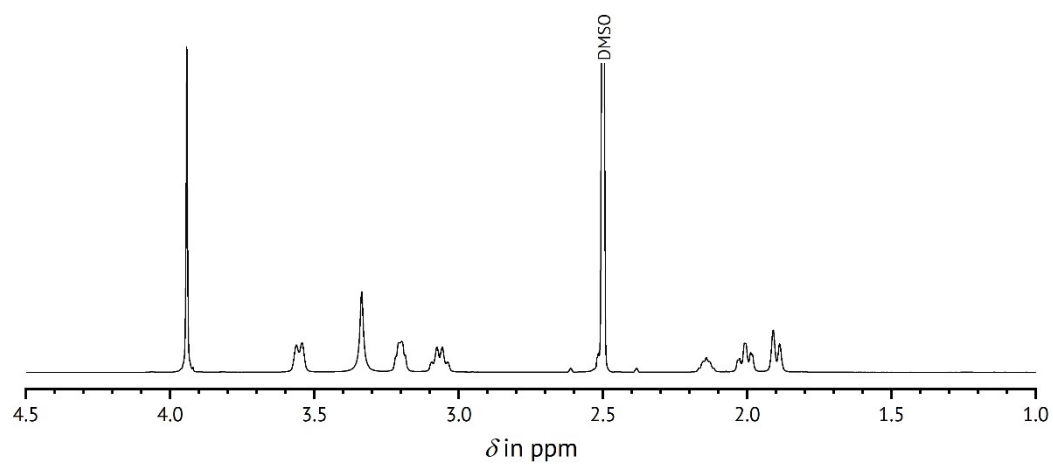

Figure S9: <sup>1</sup>H NMR spectrum of EO<sub>2</sub>-PBP measured in DMSO-d<sub>6</sub>.

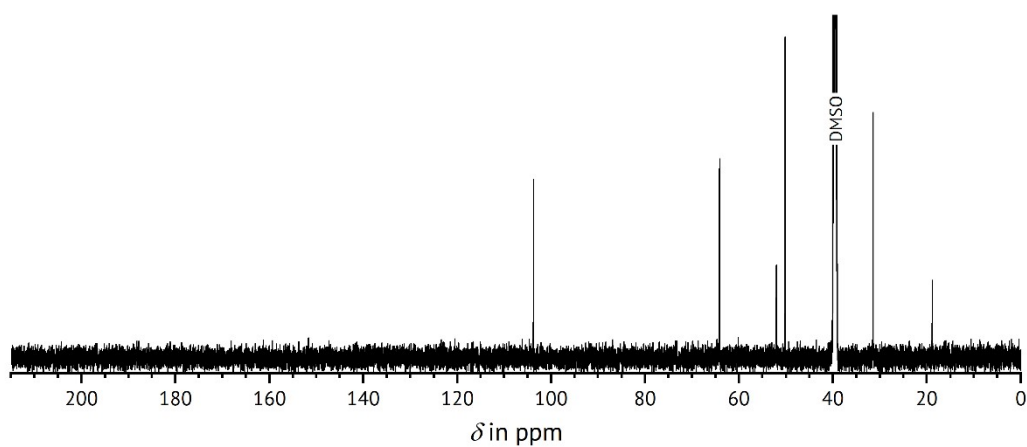

Figure S10: <sup>13</sup>C-{<sup>1</sup>H} NMR spectrum of EO<sub>2</sub>-PBP measured in DMSO-d<sub>6</sub>.

### 3. Determination of diol contents

For a measure of electrophilicity the content of ketone and the respective diols in presence of an excess of water were calculated by use of proton NMR experiments. Therefore, a sample of all three bispiperidones, as well as a sample of commercially available 1,4-cyclohexanedione were dissolved in deuterated water and  $^1\text{H}$  NMR experiments were conducted. Defined signals that could be assigned clearly to either the ketone or diol species were integrated and the diol content  $p_{diol}$  calculated. Signal assignments were confirmed via 2d NMR spectroscopy.

In the following NMR spectra, signal assignment, integrals and calculation pathways are shown. It needs to be considered, that three species, the bis-ketone, the ketone-diol and the bis-diol are in equilibrium with each other. For simplification, only 6-membered rings bearing either ketone or diol were differentiated.

Protons were assigned as shown in Scheme S1. Each signal integral of  $a$ ,  $a'$ ,  $b$  and  $b'$  equals the same number of protons per molecule.

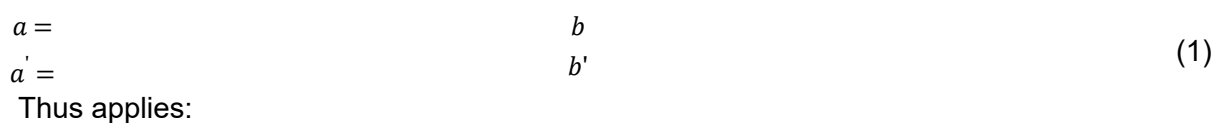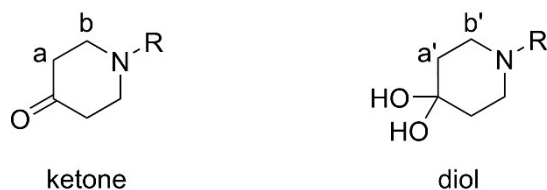

Scheme S1: Proton assignment of ketone and diol species.

## OBP

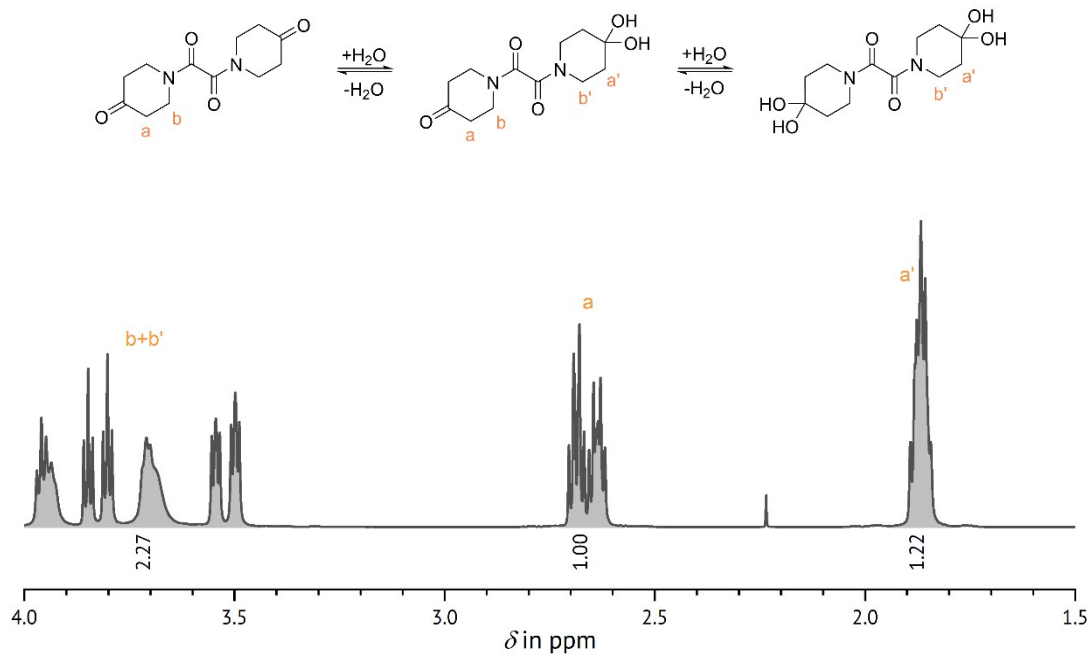

Figure S11:  $^1H$  NMR spectrum of OBP in  $D_2O$  to determine diol content by integration of proton signals as measure for electrophilicity

It was found that the integral assigned to protons  $a = 1.00$  and the integral assigned to protons  $a' = 1.22$ .

$$p_{diol} = \frac{a'}{a + a'} \quad (2)$$

$$p_{diol} = \frac{1.22}{1.22 + 1.00}$$

$$p_{diol} = 55\%$$

A diol content of 55% was found.

## ABP

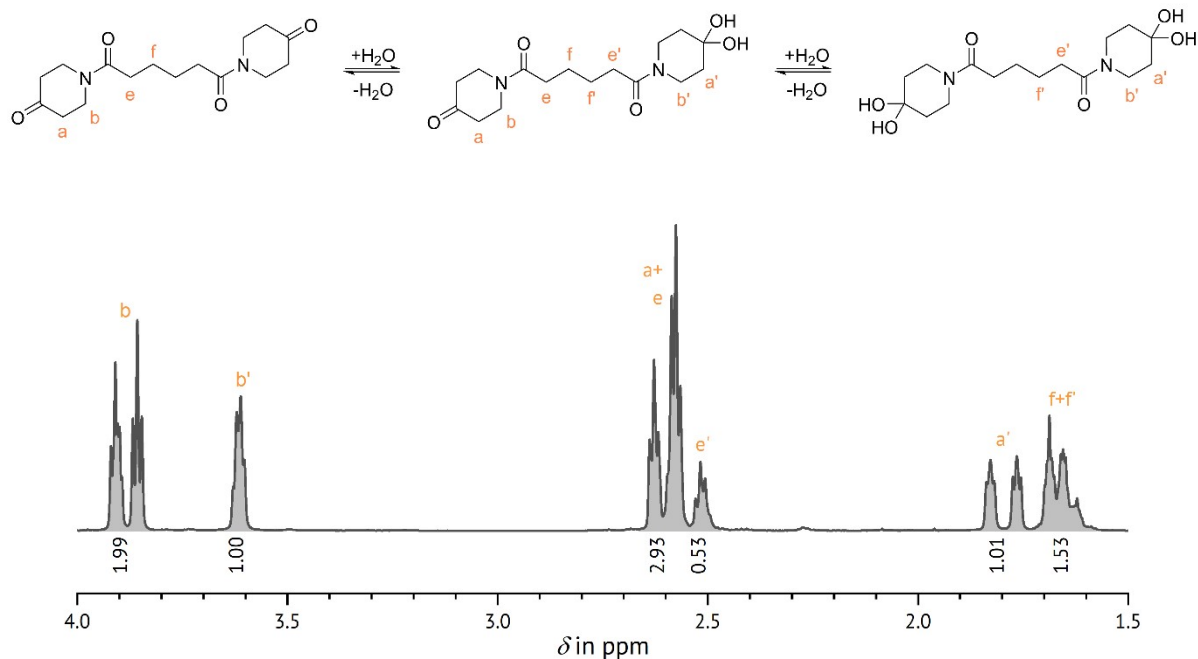

Figure S12: <sup>1</sup>H NMR spectrum of ABP in D<sub>2</sub>O to determine diol content by integration of proton signals as measure for electrophilicity

It was found that the integral assigned to protons  $b = 1.99$  and the integral assigned to protons  $b' = 1.00$ .

$$p_{diol} = \frac{b'}{b' + b} \quad (3)$$

$$p_{diol} = \frac{1.00}{1.00 + 1.99}$$

$$p_{diol} = 33\%$$

A diol content of 33% was found.

## PBP

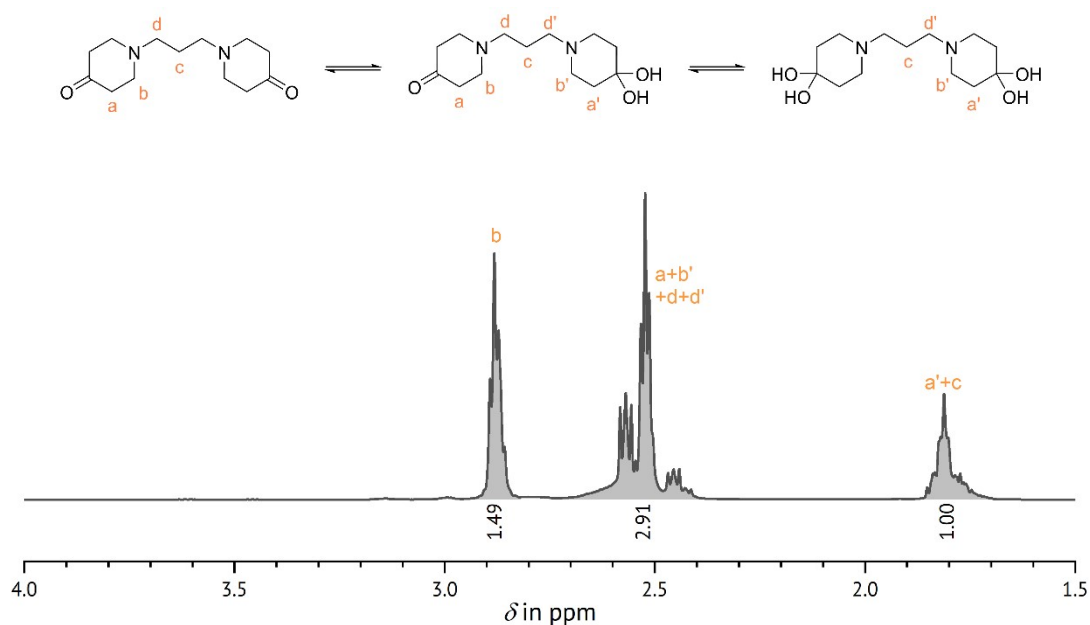

Figure S13:  $^1\text{H}$  NMR spectrum of PBP in  $\text{D}_2\text{O}$  to determine diol content by integration of proton signals as measure for electrophilicity.

In contrast to ABP and OBP determination of diol content  $p_{diol}$  requires determination of  $a' = b'$  first, as no distinct signals show up in NMR spectrum.

It was found that the integral assigned to protons  $b = 1.49$  and the integral assigned to protons  $a' + c = 1.00$ .

In one molecule of PBP in  $\text{D}_2\text{O}$  signals  $a + a'$  equals 8 protons whilst signal  $c$  equals 2 protons, leading to equation (4).

$$a + a' = 4c \quad (4)$$

$$b + a' = 4c$$

$$a' = 4c - b$$

$$a' = 4c - 1.49 \quad (4a)$$

with

$$a' + c = 1.00 \quad (5)$$

$$c = 1.00 - a' \quad (5a)$$

combining equations (4a) and (5a)

$$a' = 4 \cdot (1.00 - a') - 1.49 \quad (4b)$$

$$a' = 4.00 - 4a' - 1.49$$

$$a' = \frac{4.00 - 1.49}{5}$$

$$a' = 0.50$$

It was found that the integral assigned to protons  $b = a = 1.49$  and the integral assigned to protons  $a' = 0.50$ .

$$p_{diol} = \frac{a'}{a' + a} \quad (2)$$

$$p_{diol} = \frac{0.50}{0.50 + 1.49}$$

$$p_{diol} = 25\%$$

A diol content of 25% was found.

## 1,4-Cyclohexanedione

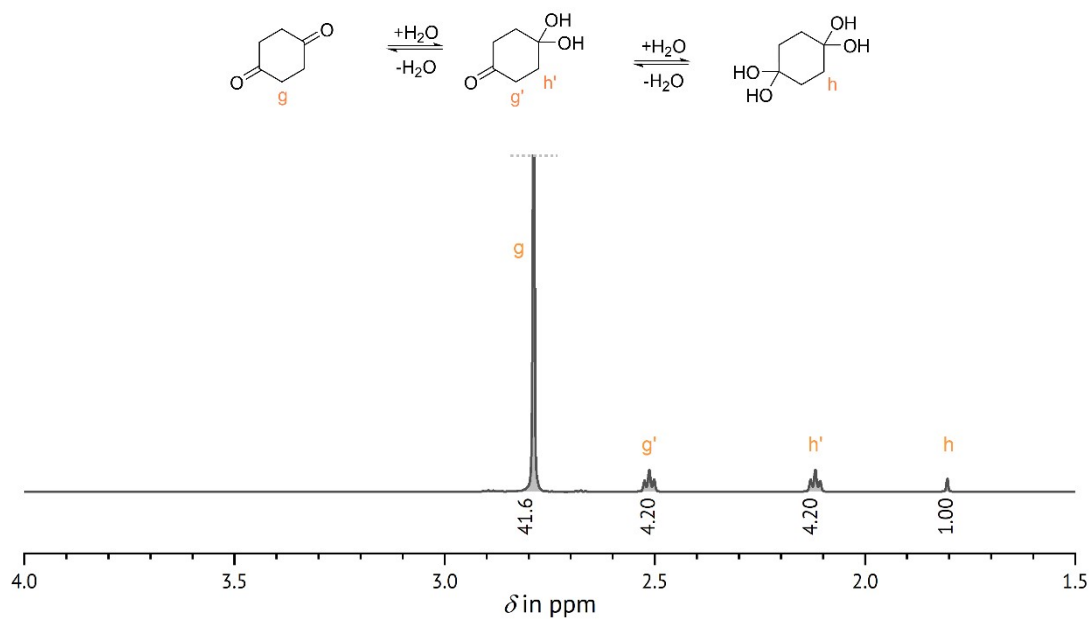

Figure S14: <sup>1</sup>H NMR spectrum of 1,4-cyclohexanedione in D<sub>2</sub>O to determine diol content by integration of proton signals as measure for electrophilicity.

It was found that the integrals assigned to protons  $g = 41.6$ ,  $g' = 4.20$ ,  $h' = 4.20$  and the integral assigned to protons  $h = 1.00$ .

$$p_{diol} = \frac{h' + h}{h' + h + g' + g} \quad (6)$$

$$p_{diol} = \frac{1.00 + 4.20}{1.00 + 4.20 + 4.20 + 41.6}$$

$$p_{diol} = 10\%$$

A diol content of 10% was found.

#### 4. NMR spectra of model compounds NAP-I and NAP-E

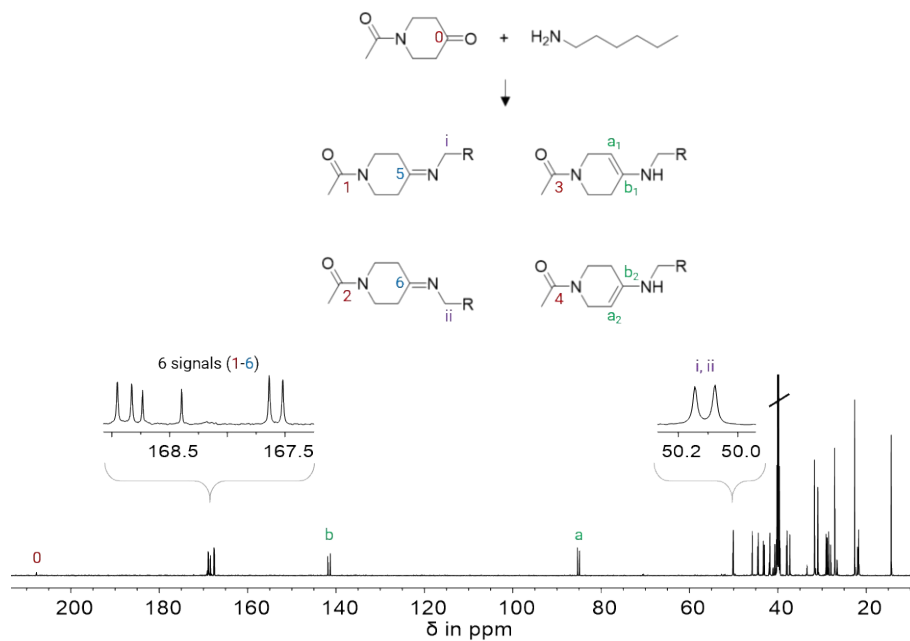

Figure S15:  $^{13}\text{C}$   $\{^1\text{H}\}$  NMR spectrum of reaction product of NAP and hexylamine showing both, NAP-I and NAP-E were formed. Hindered rotation of the C-N-bond leads to multiple carbon signals, which were assigned to the respective product structures.



## 5. FT ATIR spectra of polymers

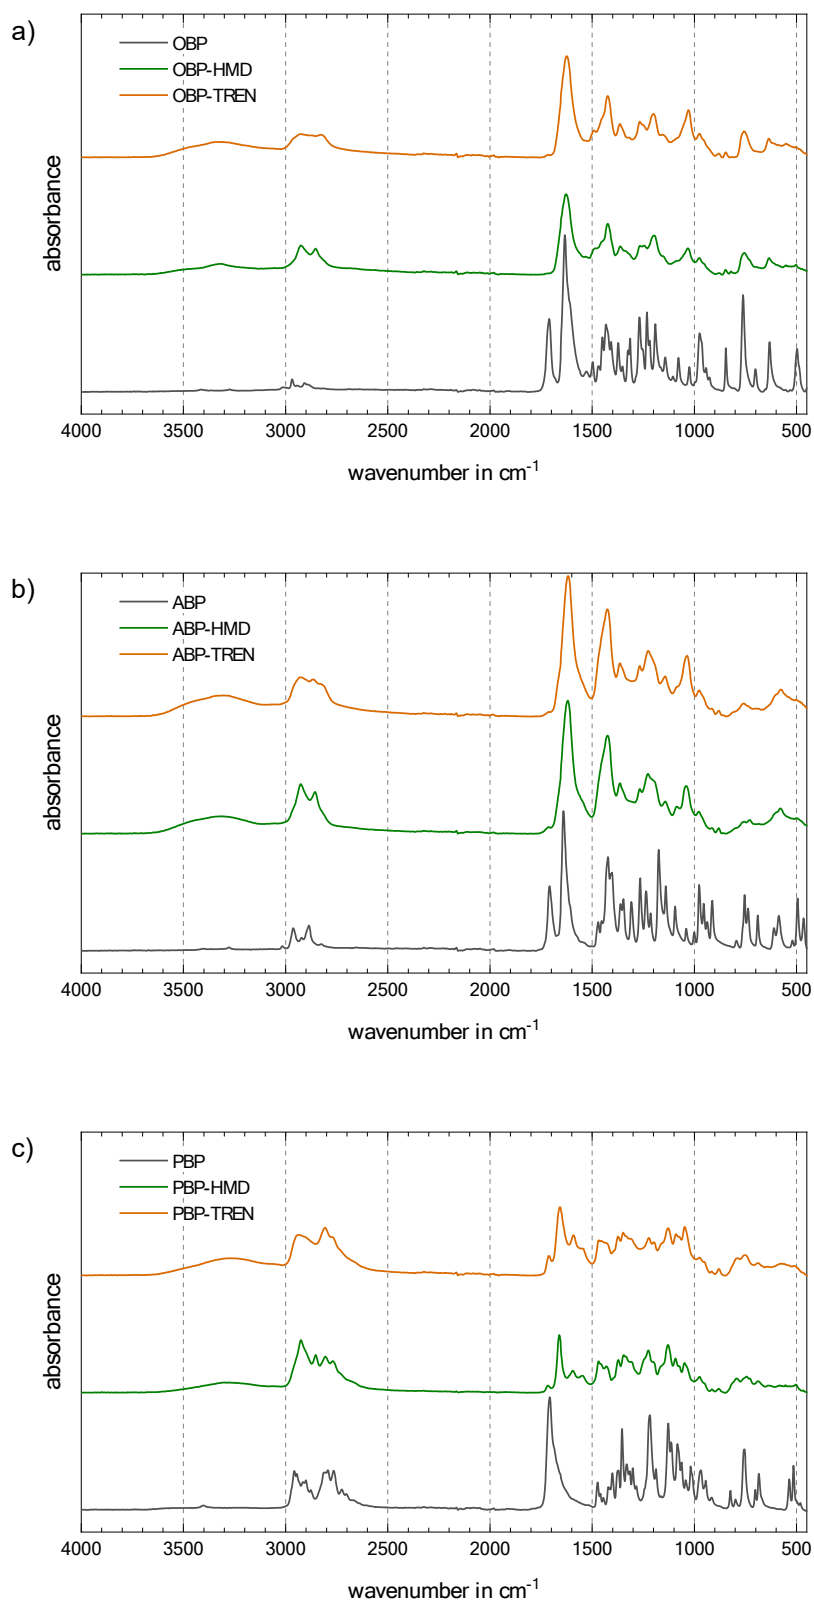

Figure S16: FT-ATIR spectra of a) OBP and the resulting polymers OBP-HMD and OBP-TREN, b) ABP and the resulting polymers ABP-HMD and ABP-TREN, c) PBP and the resulting polymers PBP-HMD and PBP-TREN.

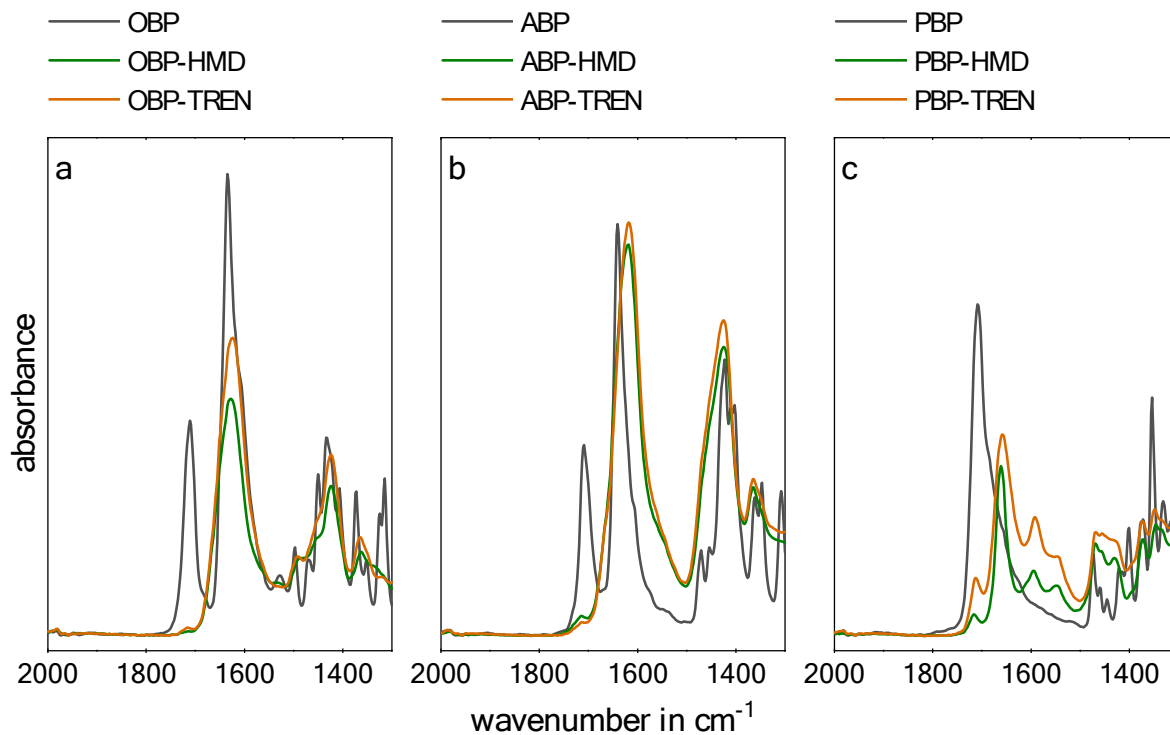

Figure S17: FT-ATIR spectra from 1300  $\text{cm}^{-1}$  to 2000  $\text{cm}^{-1}$  for comparison of C=O bands in monomers and polymers of a) OBP and the resulting polymers OBP-HMD and OBP-TREN, b) ABP and the resulting polymers ABP-HMD and ABP-TREN, c) PBP and the resulting polymers PBP-HMD and PBP-TREN.

## 6. TGA data of polymers

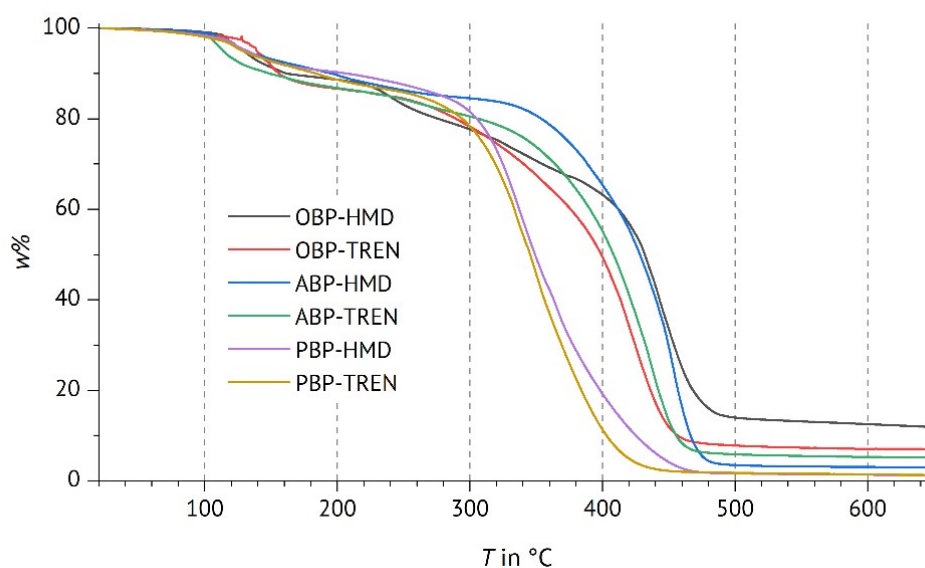

Figure S18: Plots of TGA analysis of all polymers measured under nitrogen atmosphere and at a constant heating rate of 10  $\text{K min}^{-1}$ . First decomposition occurs above 100  $^{\circ}\text{C}$ .

## 7. Hydrolysis of Bispiperidone-TREN polymers

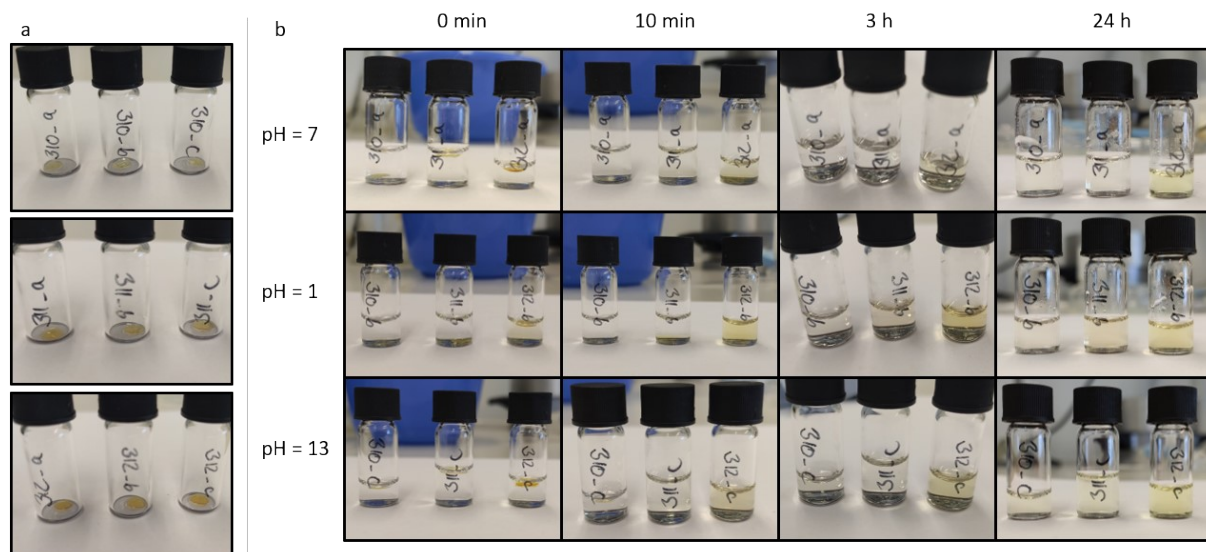

Figure S19: a) Polymers OBP-TREN (top), ABP-TREN (middle) and PBP-TREN (bottom) before hydrolysis, b) Polymers during hydrolysis at pH = 7 (top), 1 (middle) and 13 (bottom) right after addition of aqueous solution (0 min), after 10 min, 3 h and 24 h. Each picture shows from left to right: OBP-TREN, ABP-TREN and PBP-TREN.

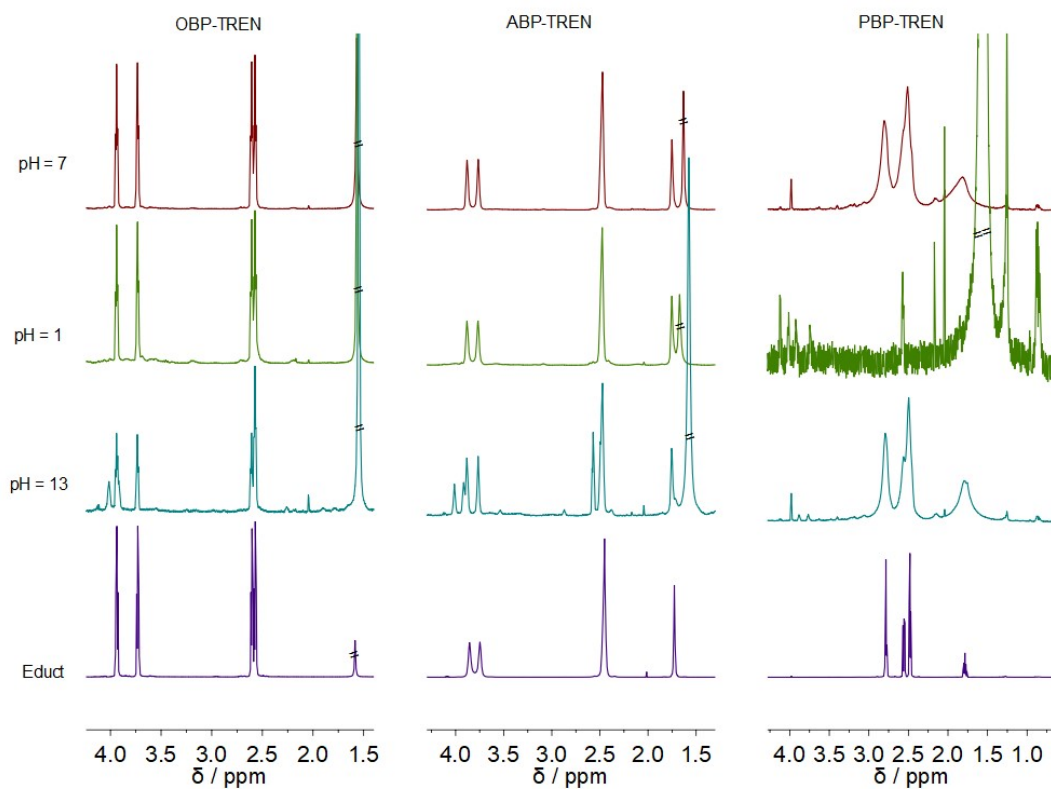

Figure S20:  $^1\text{H}$  NMR spectra of the bispiperidones OBP, ABP and PBP as used as educt (bottom) and regained after hydrolysis of OPB-TREN, ABP-TREN and PBP-TREN at pH = 7, 1 and 13.

Additional Signals in proton NMR spectra (Figure S20) of the regained bispiperidones at pH 13 in all three samples show that decomposition in alkalic media occur as well. Therefore, it is not suggested as media for hydrolysis, if monomers should be regained. The spectra of hydrolysed PBP-TREN at pH 1 shows no PBP signals due to protonation of the amines in acidic media. That leads to bad solubility in DCM and the product stays in the aqueous phase during extraction.
